# Supplementary material
Source: PubMed Central journal article supplement (PMC3677840)
Supplement: supp_JCO.2012.47.4288_DS_JCO.2012.47.4288.pdf [file supp_JCO.2012.47.4288_DS_JCO.2012.47.4288.pdf]

# **Cediranib for Metastatic Alveolar Soft Part Sarcoma**

**Kummar, et al**

## **SUPPLEMENTARY APPENDIX**

### **METHODS AND RESULTS**

#### **RNA Isolation from Biopsies**

Tumor biopsies were collected in 2 mL Eppendorf tubes filled with RNAlater (Qiagen) following the manufacturer's recommendations. Biopsies were transferred into FastPrep Lysing Matrix D tubes (MP Biomedicals) and 600  $\mu$ L of Buffer RLT (Qiagen) was added. Samples were homogenized in a FastPrep Instrument (MP Biomedicals) for 20 seconds at a speed of 4.5 m/s followed by centrifugation at 13,000 rpm for 10 minutes at 4°C. Total RNA from sample lysates was isolated using the RNeasy Mini Kit (Qiagen) according to manufacturer's instructions. Total RNA concentration was measured using a NanoDrop spectrophotometer (NanoDrop) and quality was assessed using an RNA 6000 Nano Kit (Agilent) and Agilent 2100 Bioanalyzer. Total RNA was stored at -80°C until analysis.

#### **Microarray and Statistical Analysis**

All RNA samples used for microarray analysis had a high quality score (RIN > 7). RNA (100 ng) isolated from pre- and post-cediranib treatment tumor biopsies from 8 patients (patient 23, 24, 25, 32, 34, 38, 41, and 44) was reverse transcribed and labeled with biotin following the manufacturer's protocol for the GeneChip 3' IVT Express Labeling Kit (Affymetrix).

Hybridization, staining, and scanning were performed in quadruplicate using the GeneChip Human Genome U133 Plus 2.0 Array (Affymetrix), which queries 47,000 transcripts genome-wide using 54,000 probe sets, and the Affymetrix GeneChip Scanner 3000 according to the manufacturer's protocol. The stored images were aligned and analyzed using the GeneChip Operating System software (GCOS; Affymetrix).

Bioconductor version 2.10<sup>1</sup> and R version 2.15.1<sup>2</sup> were used for analysis of the microarray data. Arrays were pre-processed with the RMA algorithm for background correction, quantile normalization, and transcript summarization. Probe sets with low variability were removed from the analysis set. Additionally, if multiple probe sets mapped to the same gene, then the probe set with the largest overall variability was retained for analysis; after screening, there were 10,034 probe sets/genes. A paired, moderated t- test was conducted for each probe set with the LIMMA software package<sup>3</sup> and the P values were adjusted for multiple testing using the Benjamini-Hochberg false discovery rate procedure.<sup>4</sup> Expression data were log<sub>2</sub> transformed.

### **Quantitative Real-Time PCR**

Following total RNA isolation, cDNA was prepared from 500 ng total RNA for pre- and post-cediranib tumor biopsy samples using TaqMan High Capacity Reverse Transcription Reagents and the GeneAmp PCR System 9700 (Applied Biosystems) following the manufacturer's protocol. Quantitative real-time PCR (qRT-PCR) reactions using 10 ng cDNA were performed in triplicate using the TaqMan Fast Universal PCR Master Mix and the StepOnePlus Real-Time PCR System (Applied Biosystems) following the manufacturer's protocol. Commercially available TaqMan gene expression assays from Applied Biosystems included ANGPT2, CCL2, CD163, CXCR7, EMILIN2, ESM-1, FLT1 (VEGFR1), FOLH1, KDR (VEGFR2), and TEK (Table S3). TaqMan GAPDH control reagents were used as endogenous controls. Results from qRT-PCR for genes of interest were normalized to GAPDH using the comparative Ct method as described previously.<sup>5</sup> Relative gene expression was expressed as the fold-change between pre- and post-treatment samples and statistical changes in gene expression from vehicle were determined using a paired Students t-test (n=7) with the significance level ( $\alpha$ ) set at 0.05.

## **<sup>18</sup>F-FDG PET/CT Technique and Data Analysis**

Patients underwent a whole body <sup>18</sup>F- fluorodeoxyglucose positron-emission tomography/computed tomography (<sup>18</sup>F-FDG PET/CT) scan using a Philips Gemini TF PET/CT camera. The intravenous dose of <sup>18</sup>F-FDG administered ranged from 10 to 15 mCi; patients were rested for approximately 60 min before scanning. To standardize imaging conditions and assure that elevated blood glucose levels would not affect <sup>18</sup>F-FDG uptake measurements, patients were instructed to fast for at least 6 hours prior to PET/CT examination. Blood glucose levels were normal in peripheral blood at the time of the radiotracer injection for all patients.

A whole-body, non-diagnostic, low-dose CT scan (140 kV, 80 mA) was performed for attenuation correction purposes and anatomic localization of <sup>18</sup>F-FDG uptake. No iodinated contrast material was administered for the CT scan. Immediately after the CT, an emission whole-body PET scan was acquired over the same anatomical regions. The acquisition PET scan duration was 2 to 3 minutes per bed position, depending on patient body weight.

The PET emission scan was corrected using segmented attenuation data from the CT scan. Transverse, sagittal, and coronal PET reconstructions as well as 3D rotating maximum pixel intensity projection images were generated.

Co-registered PET/CT scans were displayed using MIM 4.2 software (MIM Software Inc.). The resulting axial, coronal, and sagittal slices were analyzed by one experienced nuclear medicine physician, who was blinded to histopathologic treatment response and CT size measurements.

Suspicious hypermetabolic foci were analyzed semi-quantitatively using the standardized uptake value (SUV). Volumes of interest were outlined in the tumor sites seen on CT, which showed

abnormal increased  $^{18}\text{F}$ -FDG uptake, to obtain a corresponding  $\text{SUV}_{\text{max}}$ , defined as the mean value of the 80% threshold of the maximum pixel value. This approach was used for baseline and follow-up scans. Percentage of SUV change was calculated between baseline and follow-up PET/CT scans. A greater than 25% change in  $\text{SUV}_{\text{max}}$  was considered significant.

### **Gene Expression in HUVECs and in an ASPS-1 Cell Line**

Human umbilical vein endothelial cells (HUVECs) were obtained from and cultured in EBM-2 media supplemented with EGM-2 BulletKit (Lonza). ASPS-1 cells were a kind gift from Dr. David Vistica, DTCD/DTP Screening Technologies Branch, Frederick National Laboratory for Cancer Research, and were cultured in DMEM/F-12 50/50 (Mediatech Inc.) supplemented with 10% FBS. HT29 cells were obtained from the NCI-60 Human Tumor Cell Line Screen (Frederick National Laboratory for Cancer Research) and cultured in RPMI-1640 (Quality Biological) supplemented with 5% FBS.

HUVEC and ASPS-1 cells were seeded into 6 well plates at a density of  $2.5 \times 10^5$  cells/well, and after 24 h, cediranib and sunitinib were added to a final concentration of 2000 nM. Two, 6, and 24 hours after the addition of the drugs, media/drug was aspirated from the wells, and the cell monolayer was lysed with Qiagen's buffer RLT. Total RNA was isolated from the lysates of three independent treatments using the RNeasy mini kit (Qiagen) following manufacturer's protocols.

Five hundred nanograms of total RNA for each sample was reverse transcribed using the GeneAmp<sup>®</sup> PCR System 9700 and TaqMan<sup>®</sup> Reverse Transcription Reagents kit. Quantitative

real time PCR reactions were conducted and measured using the ABI StepOnePlus™ real time PCR system and Fast TaqMan® chemistries using pre-designed ABI TaqMan® assays for the genes of interest. Samples were tested in triplicate wells for the genes of interest and for the endogenous control, GAPDH. Data were analyzed using the comparative Ct method as described in the Perkin Elmer User Bulletin #2 (ABI Prism® 7700 Sequence Detection System, 1997) and expressed as a fold induction of the gene in the drug treated samples compared to the untreated control samples.

Statistical and clustering analysis was performed using Partek software, version 6.5 (Partek Inc), with RMA background correction and quantile normalization. Differentially expressed genes were identified with a 1-way ANOVA model. Genes were selected that were up- or down-regulated more than 1.5 fold and with a  $P < 0.01$ .

### ***Characterization of selected response genes***

Because vascular and inflammatory responses to cediranib were observed, we examined the expression of these genes in ASPS-1 and HUVEC cells 2, 6, and 24 hours post treatment. Gene responses for HUVEC and ASPS-1 cells were most highly modulated 6 hours after treatment. Figure S1 compares the response of selected genes in HUVEC cells and the ASPS-1 cell lines to cediranib (2  $\mu$ M) and sunitinib (2  $\mu$ M) after treatment for 6 hours. These data suggest that, although both VEGFR inhibitors modulate some of the genes in a similar manner, there are distinct differences. Notably, ESM-1, the most highly down-regulated cediranib-response gene, was significantly induced by sunitinib, but down regulated by cediranib, in both HUVEC and ASPS-1 cells. We confirmed that ESM-1 was down-regulated in ASPS-1 cells following 3 days

of daily treatment with 150 nM cediranib (data not shown). Moreover, ANGPT1 and FOLH1, two marker genes for cediranib response, were also differentially regulated by the 2 agents in HUVEC cells, although they were not significantly expressed in ASPS-1 cells.

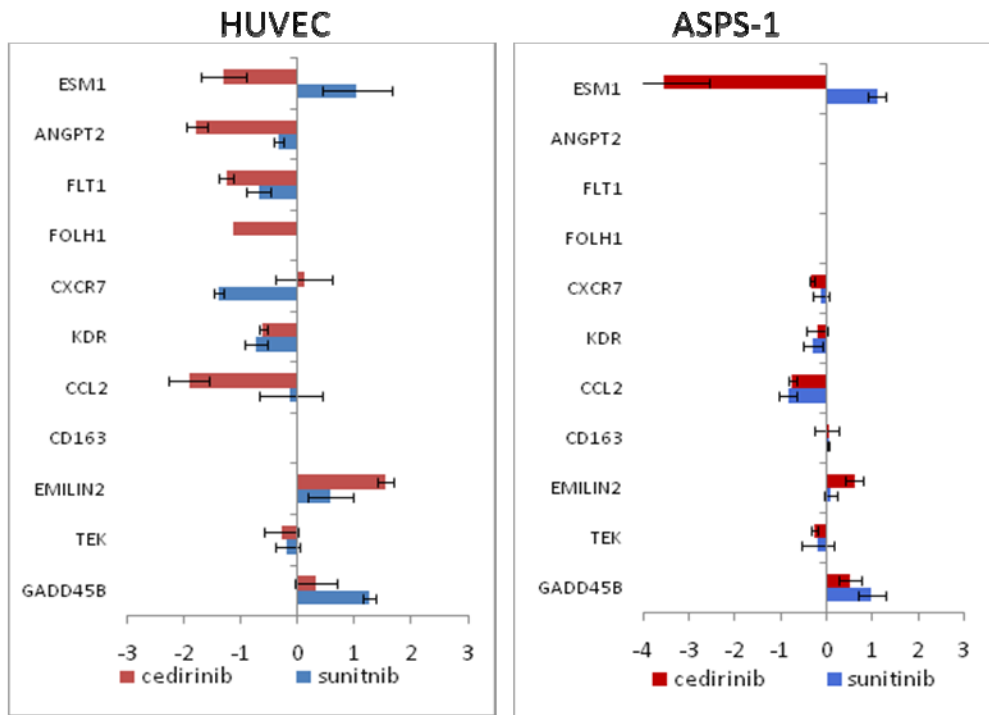

Figure S1: Changes in gene expression measured following 6-hour treatment with 2  $\mu$ M cediranib or 2  $\mu$ M sunitinib in HUVEC cells and the ASPS-1 cell line. Error bars represent the average of 3 separate experiments ( $\pm$  SD).



**Table S1.** Top 100 Up- and Down-Regulated Probe Sets Detected in 8 Patients Ranked by

Adjusted P Value

| <b>Rank</b> | <b>Affymetrix<br/>Probe Set</b> | <b>Gene<br/>Symbol</b> | <b>Log<sub>2</sub><br/>FC*</b> | <b>Avg Exp</b> | <b>t</b> | <b>P value</b> | <b>Adjusted<br/>P value</b> |
|-------------|---------------------------------|------------------------|--------------------------------|----------------|----------|----------------|-----------------------------|
| 1           | 204726_at                       | CDH13                  | -1.28                          | 7.25           | -9.81    | < 0.001        | 0.02                        |
| 2           | 211148_s_at                     | ANGPT2                 | -2.14                          | 6.78           | -8.92    | < 0.001        | 0.02                        |
| 3           | 222922_at                       | KCNE3                  | -2.04                          | 4.95           | -8.40    | < 0.001        | 0.03                        |
| 4           | 212909_at                       | LYPD1                  | -1.14                          | 5.66           | -7.96    | < 0.001        | 0.03                        |
| 5           | 226814_at                       | ADAMTS9                | -1.17                          | 6.93           | -7.90    | < 0.001        | 0.03                        |
| 6           | 221489_s_at                     | SPRY4                  | -0.98                          | 7.13           | -7.79    | < 0.001        | 0.03                        |
| 7           | 205860_x_at                     | FOLH1                  | -2.12                          | 7.23           | -7.33    | < 0.001        | 0.03                        |
| 8           | 205352_at                       | SERPINI1               | -1.65                          | 7.20           | -7.26    | < 0.001        | 0.03                        |
| 9           | 229546_at                       | LOC653602              | -1.45                          | 4.24           | -7.20    | < 0.001        | 0.03                        |
| 10          | 218888_s_at                     | NETO2                  | -1.46                          | 6.77           | -7.18    | < 0.001        | 0.03                        |
| 11          | 228489_at                       | TM4SF18                | -1.47                          | 6.69           | -6.82    | < 0.001        | 0.04                        |
| 12          | 242447_at                       | C3orf70                | -1.11                          | 7.00           | -6.82    | < 0.001        | 0.04                        |
| 13          | 225911_at                       | NPNT                   | -1.35                          | 6.38           | -6.62    | < 0.001        | 0.04                        |
| 14          | 205547_s_at                     | TAGLN                  | 1.18                           | 8.66           | 6.58     | < 0.001        | 0.04                        |
| 15          | 211303_x_at                     | FOLH1B                 | -1.71                          | 5.88           | -6.53    | < 0.001        | 0.04                        |
| 16          | 204914_s_at                     | SOX11                  | -1.51                          | 5.41           | -6.52    | < 0.001        | 0.04                        |
| 17          | 1555561_a_at                    | UGGT2                  | -0.67                          | 4.89           | -6.48    | < 0.001        | 0.04                        |
| 18          | 231513_at                       | KCNJ2                  | -1.58                          | 6.34           | -6.44    | < 0.001        | 0.04                        |
| 19          | 210815_s_at                     | CALCRL                 | -1.51                          | 6.44           | -6.44    | < 0.001        | 0.04                        |
| 20          | 35666_at                        | SEMA3F                 | -1.05                          | 8.25           | -6.43    | < 0.001        | 0.04                        |
| 21          | 219935_at                       | ADAMTS5                | -1.45                          | 8.46           | -6.41    | < 0.001        | 0.04                        |
| 22          | 215177_s_at                     | ITGA6                  | -1.04                          | 7.43           | -6.38    | < 0.001        | 0.04                        |
| 23          | 212977_at                       | CXCR7                  | -1.51                          | 8.86           | -6.37    | < 0.001        | 0.04                        |
| 24          | 214228_x_at                     | TNFRSF4                | -1.07                          | 6.45           | -6.32    | < 0.001        | 0.04                        |
| 25          | 217826_s_at                     | UBE2J1                 | -0.65                          | 8.59           | -6.24    | < 0.001        | 0.04                        |
| 26          | 219522_at                       | FJX1                   | -0.72                          | 7.26           | -6.16    | < 0.001        | 0.04                        |
| 27          | 235666_at                       | ITGA8                  | -1.67                          | 5.65           | -6.03    | < 0.001        | 0.05                        |
| 28          | 242943_at                       | ST8SIA4                | -0.81                          | 6.41           | -6.03    | < 0.001        | 0.05                        |
| 29          | 226498_at                       | FLT1                   | -1.90                          | 8.67           | -6.01    | < 0.001        | 0.05                        |
| 30          | 240317_at                       | PCDHB4                 | -0.64                          | 5.76           | -5.83    | < 0.001        | 0.06                        |
| 31          | 239952_at                       | ZEB1                   | -1.21                          | 5.53           | -5.78    | < 0.001        | 0.06                        |
| 32          | 214022_s_at                     | IFITM1                 | 0.77                           | 10.24          | 5.77     | < 0.001        | 0.06                        |
| 33          | 202669_s_at                     | EFNB2                  | -1.02                          | 6.48           | -5.76    | < 0.001        | 0.06                        |
| 34          | 205150_s_at                     | TRIL                   | -1.30                          | 6.19           | -5.74    | < 0.001        | 0.06                        |
| 35          | 232013_at                       | C9orf102               | -0.65                          | 5.20           | -5.69    | < 0.001        | 0.06                        |
| 36          | 230935_at                       | LOC100506798           | -0.82                          | 5.03           | -5.66    | < 0.001        | 0.06                        |
| 37          | 219213_at                       | JAM2                   | 0.75                           | 6.53           | 5.56     | < 0.001        | 0.07                        |
| 38          | 222562_s_at                     | TNKS2                  | -0.69                          | 7.14           | -5.55    | < 0.001        | 0.07                        |

| Rank | Affymetrix Probe Set | Gene Symbol | Log <sub>2</sub> FC* | Avg Exp | t     | P value | Adjusted P value |
|------|----------------------|-------------|----------------------|---------|-------|---------|------------------|
| 39   | 206574_s_at          | PTP4A3      | -1.00                | 7.28    | -5.55 | < 0.001 | 0.07             |
| 40   | 226899_at            | UNC5B       | -0.81                | 8.12    | -5.52 | < 0.001 | 0.07             |
| 41   | 226499_at            | NRARP       | -0.78                | 7.95    | -5.47 | < 0.001 | 0.07             |
| 42   | 207677_s_at          | NCF4        | 0.45                 | 6.54    | 5.43  | < 0.001 | 0.07             |
| 43   | 222911_s_at          | CXorf36     | -1.19                | 6.02    | -5.43 | < 0.001 | 0.07             |
| 44   | 1566968_at           | SPRY4-IT1   | -0.83                | 6.11    | -5.42 | < 0.001 | 0.07             |
| 45   | 238066_at            | RBP7        | -1.05                | 7.49    | -5.42 | < 0.001 | 0.07             |
| 46   | 1555725_a_at         | RGS5        | -1.67                | 9.33    | -5.42 | < 0.001 | 0.07             |
| 47   | 208394_x_at          | ESM1        | -2.57                | 6.60    | -5.38 | < 0.001 | 0.07             |
| 48   | 204639_at            | ADA         | -0.51                | 7.24    | -5.38 | < 0.001 | 0.07             |
| 49   | 221031_s_at          | APOLD1      | -1.24                | 7.81    | -5.31 | < 0.001 | 0.07             |
| 50   | 203934_at            | KDR         | -1.20                | 8.13    | -5.26 | < 0.001 | 0.08             |
| 51   | 1552417_a_at         | NEDD1       | -0.73                | 5.96    | -5.26 | < 0.001 | 0.08             |
| 52   | 206211_at            | SELE        | 1.57                 | 4.14    | 5.25  | < 0.001 | 0.08             |
| 53   | 205786_s_at          | ITGAM       | 0.56                 | 7.47    | 5.22  | < 0.001 | 0.08             |
| 54   | 205902_at            | KCNN3       | -0.94                | 5.38    | -5.18 | < 0.001 | 0.08             |
| 55   | 223525_at            | DLL4        | -0.78                | 6.26    | -5.16 | < 0.001 | 0.08             |
| 56   | 221011_s_at          | LBH         | -1.05                | 8.59    | -5.15 | < 0.001 | 0.08             |
| 57   | 226420_at            | MECOM       | -0.97                | 7.50    | -5.15 | < 0.001 | 0.08             |
| 58   | 206236_at            | GPR4        | -0.80                | 6.77    | -5.13 | < 0.001 | 0.08             |
| 59   | 1558093_s_at         | MATR3       | -0.58                | 7.22    | -5.11 | < 0.001 | 0.08             |
| 60   | 218876_at            | TPPP3       | -0.72                | 6.45    | -5.08 | < 0.001 | 0.08             |
| 61   | 226576_at            | ARHGAP26    | -0.75                | 6.35    | -5.08 | < 0.001 | 0.08             |
| 62   | 226829_at            | AFAP1L2     | -0.90                | 5.06    | -5.06 | < 0.001 | 0.08             |
| 63   | 1558404_at           | LOC644242   | -0.97                | 4.72    | -5.05 | < 0.001 | 0.08             |
| 64   | 219825_at            | CYP26B1     | 1.13                 | 5.78    | 5.02  | < 0.001 | 0.08             |
| 65   | 219134_at            | ELTD1       | -0.85                | 8.84    | -5.01 | < 0.001 | 0.08             |
| 66   | 204736_s_at          | CSPG4       | -0.73                | 5.88    | -5.01 | < 0.001 | 0.08             |
| 67   | 205258_at            | INHBB       | -0.90                | 7.65    | -4.98 | < 0.001 | 0.09             |
| 68   | 216598_s_at          | CCL2        | 1.59                 | 8.27    | 4.97  | < 0.001 | 0.09             |
| 69   | 203100_s_at          | CDYL        | -0.54                | 7.03    | -4.96 | < 0.001 | 0.09             |
| 70   | 205247_at            | NOTCH4      | -0.69                | 7.19    | -4.95 | < 0.001 | 0.09             |
| 71   | 203130_s_at          | KIF5C       | -0.62                | 5.77    | -4.94 | < 0.001 | 0.09             |
| 72   | 229459_at            | FAM19A5     | -1.09                | 3.96    | -4.92 | < 0.001 | 0.09             |
| 73   | 200795_at            | SPARCL1     | -0.83                | 10.99   | -4.89 | < 0.001 | 0.09             |
| 74   | 223316_at            | CCDC3       | 0.71                 | 7.30    | 4.89  | < 0.001 | 0.09             |
| 75   | 234993_at            | ABHD13      | -0.52                | 5.35    | -4.87 | < 0.001 | 0.09             |
| 76   | 213714_at            | CACNB2      | -1.02                | 5.41    | -4.86 | < 0.001 | 0.09             |
| 77   | 211665_s_at          | SOS2        | -0.53                | 5.70    | -4.85 | < 0.001 | 0.09             |
| 78   | 212486_s_at          | FYN         | -0.55                | 7.08    | -4.85 | < 0.001 | 0.09             |
| 79   | 209291_at            | ID4         | 0.82                 | 6.38    | 4.84  | < 0.001 | 0.09             |
| 80   | 1556364_at           | ADAMTS9-AS2 | 0.59                 | 4.62    | 4.83  | < 0.001 | 0.09             |
| 81   | 205119_s_at          | FPR1        | 0.72                 | 7.43    | 4.82  | < 0.001 | 0.09             |
| 82   | 229768_at            | OR51E1      | -0.81                | 6.01    | -4.81 | < 0.001 | 0.09             |

| <b>Rank</b> | <b>Affymetrix Probe Set</b> | <b>Gene Symbol</b> | <b>Log<sub>2</sub> FC*</b> | <b>Avg Exp</b> | <b>t</b> | <b>P value</b> | <b>Adjusted P value</b> |
|-------------|-----------------------------|--------------------|----------------------------|----------------|----------|----------------|-------------------------|
| 83          | 219315_s_at                 | TMEM204            | -0.74                      | 7.99           | -4.79    | < 0.001        | 0.09                    |
| 84          | 232080_at                   | HECW2              | -1.16                      | 7.35           | -4.79    | < 0.001        | 0.09                    |
| 85          | 212951_at                   | GPR116             | -0.55                      | 7.96           | -4.78    | < 0.001        | 0.09                    |
| 86          | 209582_s_at                 | CD200              | -0.96                      | 5.88           | -4.77    | < 0.001        | 0.09                    |
| 87          | 226122_at                   | PLEKHG1            | -0.56                      | 6.91           | -4.77    | < 0.001        | 0.09                    |
| 88          | 235484_at                   | PTAR1              | -0.54                      | 6.37           | -4.76    | < 0.001        | 0.09                    |
| 89          | 204273_at                   | EDNRB              | -1.17                      | 8.60           | -4.74    | < 0.001        | 0.09                    |
| 90          | 205801_s_at                 | RASGRP3            | -0.59                      | 7.67           | -4.71    | < 0.001        | 0.10                    |
| 91          | 212558_at                   | SPRY1              | -0.73                      | 8.07           | -4.70    | < 0.001        | 0.10                    |
| 92          | 1557984_s_at                | RPAP3              | -0.60                      | 5.45           | -4.68    | < 0.001        | 0.10                    |
| 93          | 234975_at                   | GSPT1              | -0.80                      | 5.13           | -4.62    | < 0.001        | 0.11                    |
| 94          | 227140_at                   | INHBA              | 1.47                       | 7.56           | 4.61     | 0.001          | 0.11                    |
| 95          | 209055_s_at                 | CDC5L              | -0.46                      | 7.78           | -4.61    | 0.001          | 0.11                    |
| 96          | 238907_at                   | ZNF780A            | -0.60                      | 4.27           | -4.59    | 0.001          | 0.11                    |
| 97          | 231789_at                   | PCDHB15            | -0.70                      | 4.62           | -4.59    | 0.001          | 0.11                    |
| 98          | 234304_s_at                 | IPO11              | -0.56                      | 7.22           | -4.54    | 0.001          | 0.11                    |
| 99          | 224374_s_at                 | EMILIN2            | 0.75                       | 6.76           | 4.54     | 0.001          | 0.11                    |
| 100         | 207968_s_at                 | MEF2C              | -0.67                      | 5.08           | -4.53    | 0.001          | 0.11                    |

\*Data presented as the mean log fold-change of microarray results from samples collected from patients 23, 24, 25, 32, 34, 38, 40 and 41. Abbreviations and definitions: Log<sub>2</sub> FC, log<sub>2</sub> fold-change from pre- to post-treatment; Avg Exp, average log<sub>2</sub> expression for pre- and post-treatment; t-test, statistic for the null hypothesis that the expression level didn't change from pre- to post-treatment; P value, unadjusted P value from the moderated paired t test; Adjusted P value, the Benjamini-Hochberg adjusted P value for false discovery rate.

**Table S2.** Microarray Data for Probe Sets of Genes Used for Further qRT-PCR Analysis

| <b>Affymetrix<br/>Probe Set</b> | <b>Gene<br/>Symbol</b> | <b>Log<sub>2</sub><br/>FC*</b> | <b>Avg<br/>Exp</b> | <b>t</b> | <b>P value</b> | <b>Adjusted<br/>P value</b> |
|---------------------------------|------------------------|--------------------------------|--------------------|----------|----------------|-----------------------------|
| 211148_s_at                     | ANGPT2                 | -2.14                          | 6.78               | -8.92    | < 0.001        | 0.025                       |
| 205860_x_at                     | FOLH1                  | -2.12                          | 7.23               | -7.33    | < 0.001        | 0.033                       |
| 212977_at                       | CXCR7                  | -1.51                          | 8.86               | -6.37    | < 0.001        | 0.038                       |
| 226498_at                       | FLT1                   | -1.90                          | 8.67               | -6.01    | < 0.001        | 0.048                       |
| 208394_x_at                     | ESM1                   | -2.57                          | 6.60               | -5.38    | < 0.001        | 0.069                       |
| 203934_at                       | KDR                    | -1.20                          | 8.13               | -5.26    | < 0.001        | 0.076                       |
| 216598_s_at                     | CCL2                   | 1.59                           | 8.27               | 4.97     | < 0.001        | 0.086                       |
| 224374_s_at                     | EMILIN2                | 0.75                           | 6.76               | 4.54     | 0.001          | 0.111                       |
| 206702_at                       | TEK                    | 0.54                           | 6.89               | 2.87     | 0.017          | 0.244                       |
| 216233_at                       | CD163                  | 0.48                           | 3.92               | 2.26     | 0.048          | 0.306                       |

\*Data presented as the mean log fold-change of microarray results from samples collected from patients 23, 24, 25, 32, 34, 38, 40, and 41. Abbreviations and definitions: Log<sub>2</sub> FC, log<sub>2</sub> fold-change from pre- to post-treatment; Avg Exp, average log<sub>2</sub> expression for pre- and post-treatment; t-test, statistic for the null hypothesis that the expression level didn't change from pre- to post-treatment; P value, unadjusted P value from the moderated paired t test; Adjusted P value, the Benjamini-Hochberg adjusted P value for false discovery rate.

**Table S3.** Genes Selected for Further Investigation by qRT-PCR

| <b>Gene symbol</b> | <b>Gene name</b>                                                                                         | <b>TaqMan probe</b> | <b>P value*</b> |
|--------------------|----------------------------------------------------------------------------------------------------------|---------------------|-----------------|
| ANGPT2             | Angiopoietin 2                                                                                           | Hs01048042_m1*      | < 0.001         |
| CCL2               | Chemokine (C-C motif) ligand 2                                                                           | Hs00234140_m1*      | < 0.001         |
| CD163              | CD163 molecule                                                                                           | Hs00174705_m1*      | 0.048           |
| CXCR7              | Chemokine (C-X-C motif) receptor 7                                                                       | Hs00604567_m1*      | < 0.001         |
| EMILIN2            | Elastin microfibril interfacer 2                                                                         | Hs00230757_m1       | 0.001           |
| ESM-1              | Endothelial cell-specific molecule 1                                                                     | Hs00199831_m1*      | < 0.001         |
| FLT1 (VEGFR1)      | Fms-related tyrosine kinase 1 (vascular endothelial growth factor/vascular permeability factor receptor) | Hs01052961_m1*      | < 0.001         |
| FOLH1              | Folate hydrolase (prostate-specific membrane antigen) 1                                                  | Hs00379515_m1       | < 0.001         |
| KDR (VEGFR2)       | Kinase insert domain receptor (a type III receptor tyrosine kinase)                                      | Hs00911700_m1*      | < 0.001         |
| TEK                | TEK tyrosine kinase, endothelial                                                                         | Hs00945146_m1*      | 0.017           |

\*Unadjusted P value from the moderated paired t test (n=5) with significance set at 0.05.

## REFERENCES

1. Gentleman RC, Carey VJ, Bates DM, et al: Bioconductor: open software development for computational biology and bioinformatics. *Genome Biol* 5:R80, 2004.
2. R Development Core Team. A language and environment for statistical computing. Foundation for Statistical Computing. Vienna, Austria. <http://www.R-project.org>.
3. Smyth GK: Linear models and empirical bayes methods for assessing differential expression in microarray experiments. *Stat Appl Genet Mol Biol* 3:Article3, 2004.
4. Benjamini Y, Hochberg Y: Controlling the False Discovery Rate - a Practical and Powerful Approach to Multiple Testing. *J R Stat Soc Series B Stat Methodol* 57:289-300, 1995.
5. Livak KJ, Schmittgen TD: Analysis of relative gene expression data using real-time quantitative PCR and the  $2^{-\Delta\Delta C(T)}$  Method. *Methods* 25:402-408, 2001.
